# Supplementary material
Source: PubMed Central journal article supplement (PMC5339290)
Supplement: mmc1.pdf [file mmc1.pdf]

**The American Journal of Human Genetics, Volume 100**

**Supplemental Data**

**Integrating Gene Expression with Summary**

**Association Statistics to Identify Genes**

**Associated with 30 Complex Traits**

**Nicholas Mancuso, Huwenbo Shi, Pagé Goddard, Gleb Kichaev, Alexander Gusev, and Bogdan Pasaniuc**

**Figure S1. Estimates of  $\rho_{g,local}$  between gene expression and trait are unbiased in simulations.** Starting from real genotype data, we simulated gene expression at independent loci. We then simulated complex trait as a linear function of predicted expression at these loci. We performed a GWAS using complex trait and subsequent TWAS at each gene (using GBLUP weights) which was used as input to estimate  $\rho_{g,local}$ . A) Results for 2,500 simulations where the causal SNPs driving gene expression were typed in the data. B) Results for 2,500 simulations where causal SNPs driving gene expression were untyped.

**A**

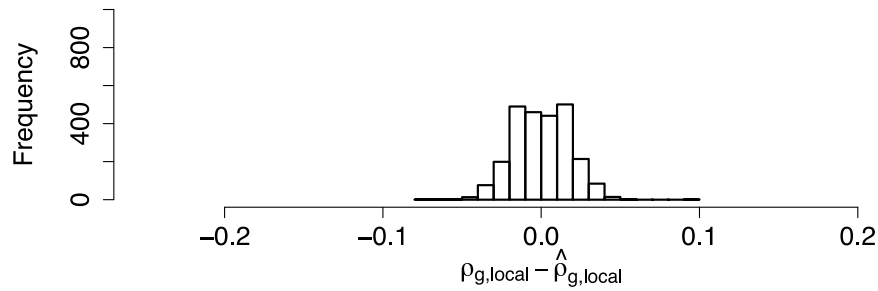

**B**

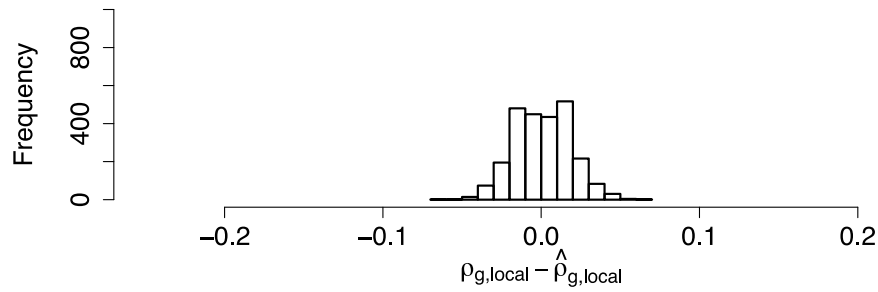

**Figure S2. QQ-plot of null distribution in simulations measuring  $\rho_{GE}$ .** The red line represents the identity line and the gray area is the 95% confidence interval of the null.

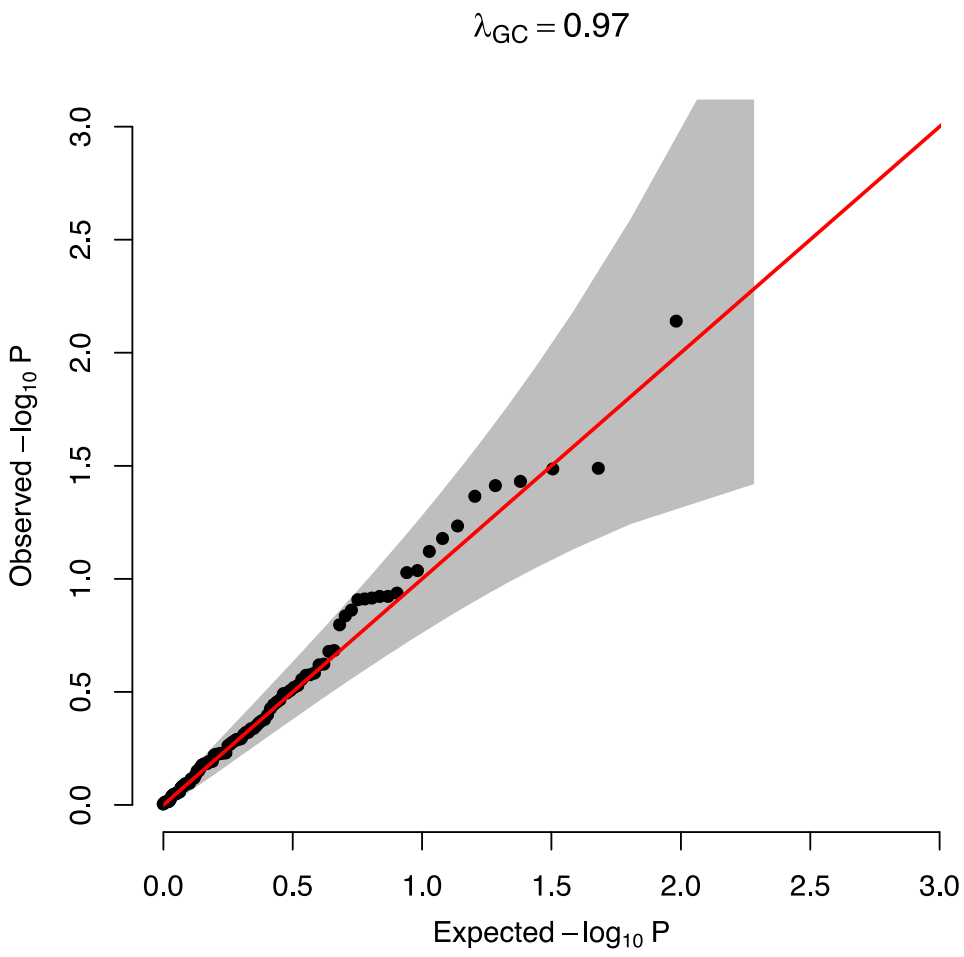

**Figure S3. Estimating  $h_{g,local}^2$  using all SNPs in a locus compared to the top eQTL.** A) Estimates of  $h_{g,local}^2$  using the described joint estimator versus the top eQTL. Results in the top row are obtained with causal SNPs typed in the data. Results in the bottom row have causal SNPs untyped/pruned from the genotype data. B) Joint estimation of  $h_{g,local}^2$  results in better estimates for  $\rho_{GE}$ . The dotted line is the identity line. Each point represents the mean estimated  $\rho_{GE}$  over 100 simulations. Error bars capture the 95% confidence interval.

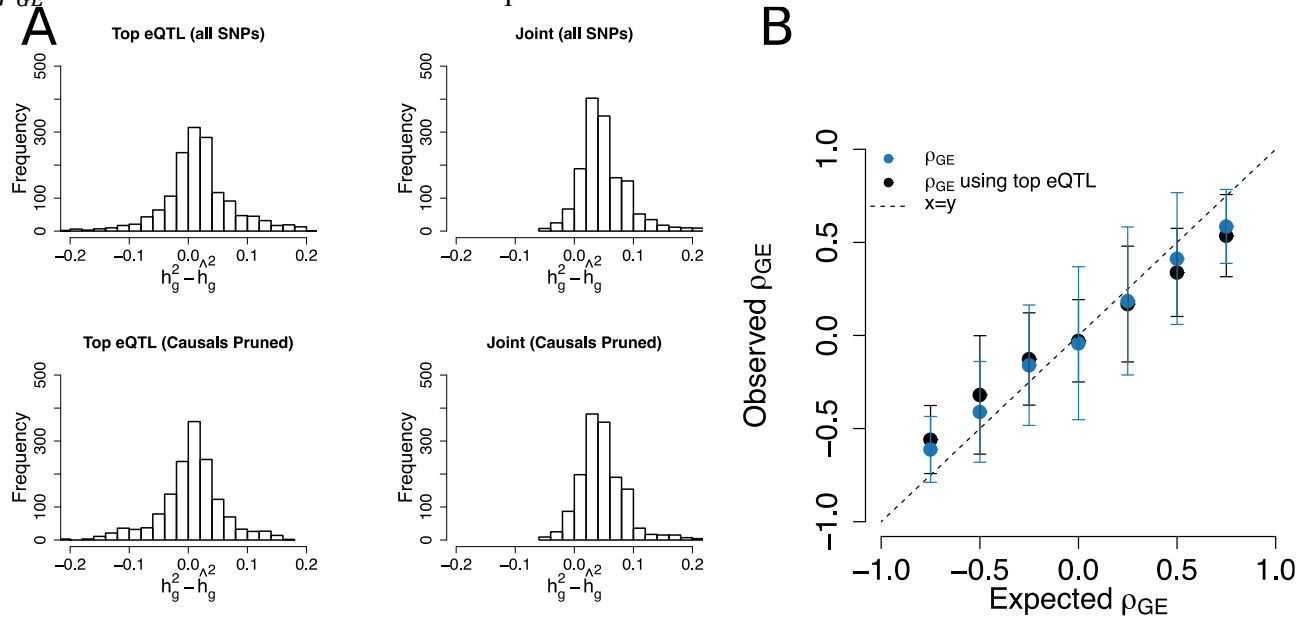

**Figure S4. SNP association P-values at reported susceptibility genes not proximal to a genome-wide significant SNP tend to be suggestive.** The red dotted line represents genome-wide significance.

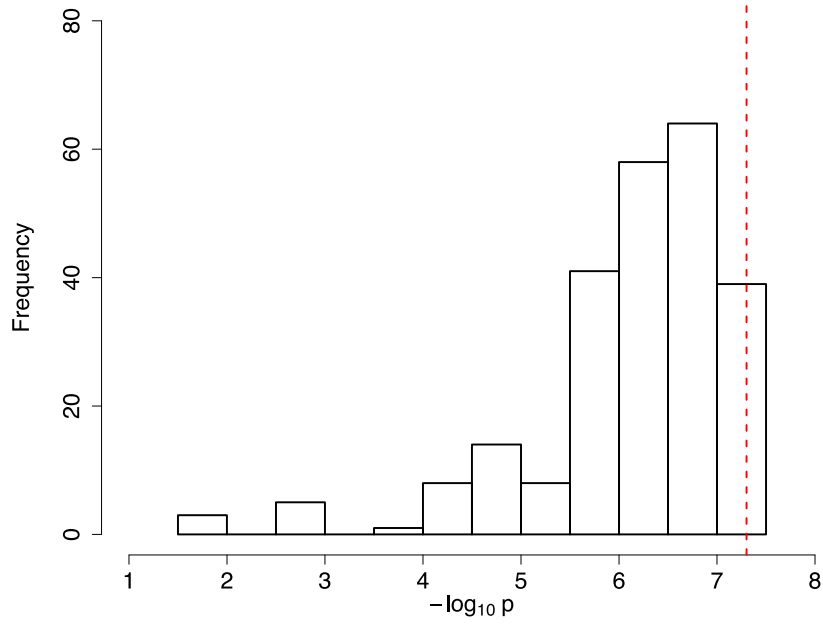

**Figure S5. Distance from index SNP to gene transcription start site.** Overlap was determined by selecting all SNPs within a 1 Mb flanking region around the gene's TSS. The red curve represents the estimated density assuming a Laplacian distribution of distances from the TSS.

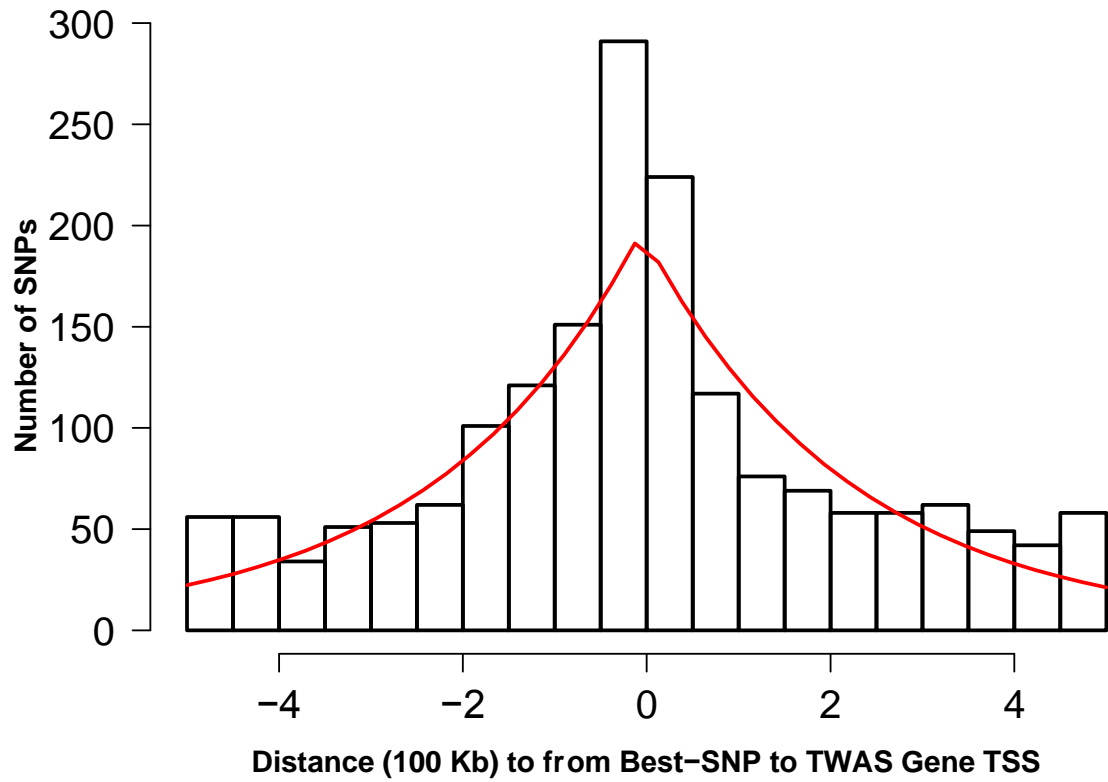

**Figure S6. Distribution of association statistics for genes closest to index SNPs versus the top gene.** The difference in means was significant under a Welch's t-test. Error-bars capture the lower and upper quartiles, with outliers represented as points.

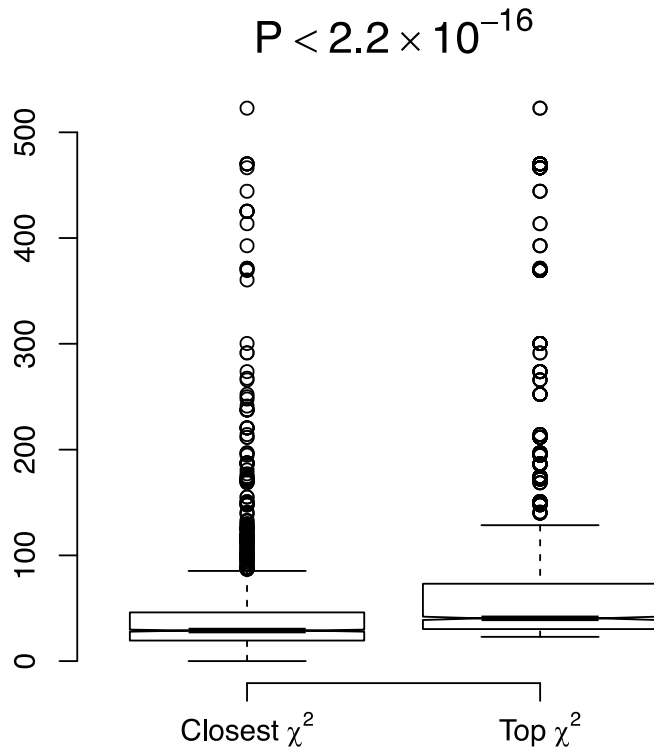

**Figure S7. Number of genes associated with multiple traits.**

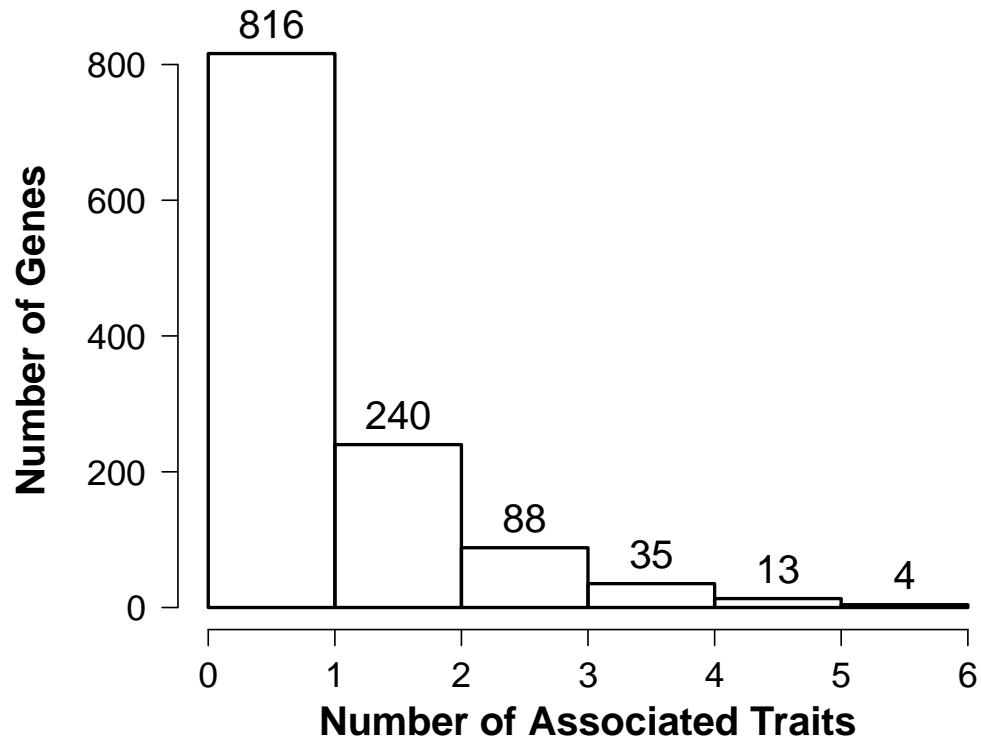



**Figure S8. Comparing  $\rho_{GE}$  estimates computed using the top eQTL versus the entire locus.** Estimates of  $\rho_{GE}$  in real data using the top eQTL are highly consistent with original estimates. The blue line represents the regression line fitted to the data.

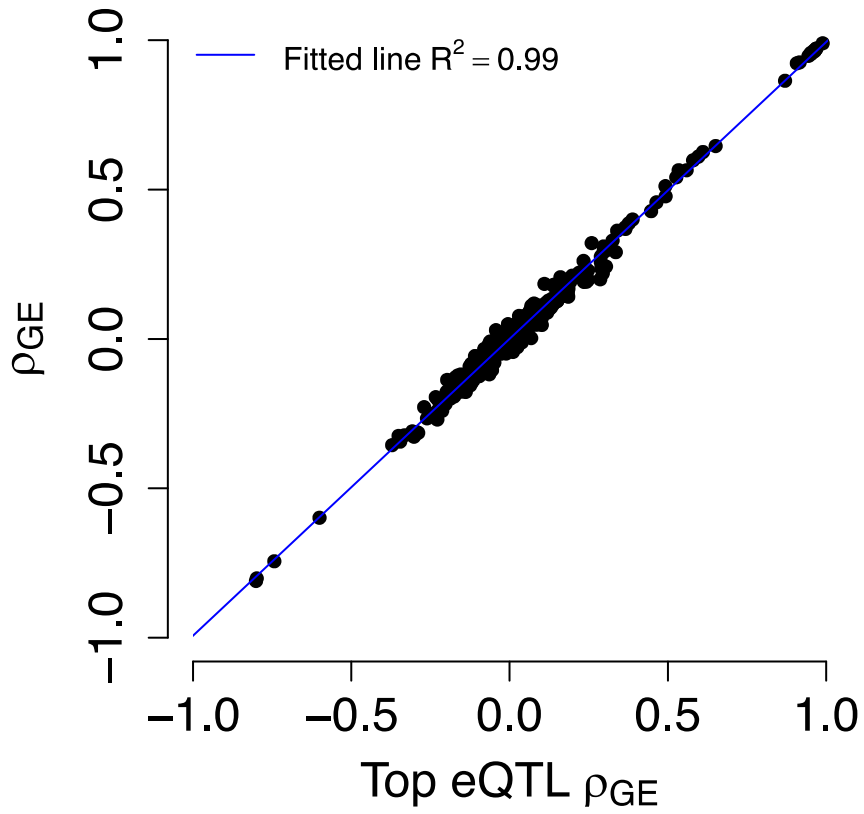

**Figure S9. Molecular function analysis of TWAS genes for all traits.** We only list functions that are significant ( $P < 0.05$ ) after Bonferroni correction.

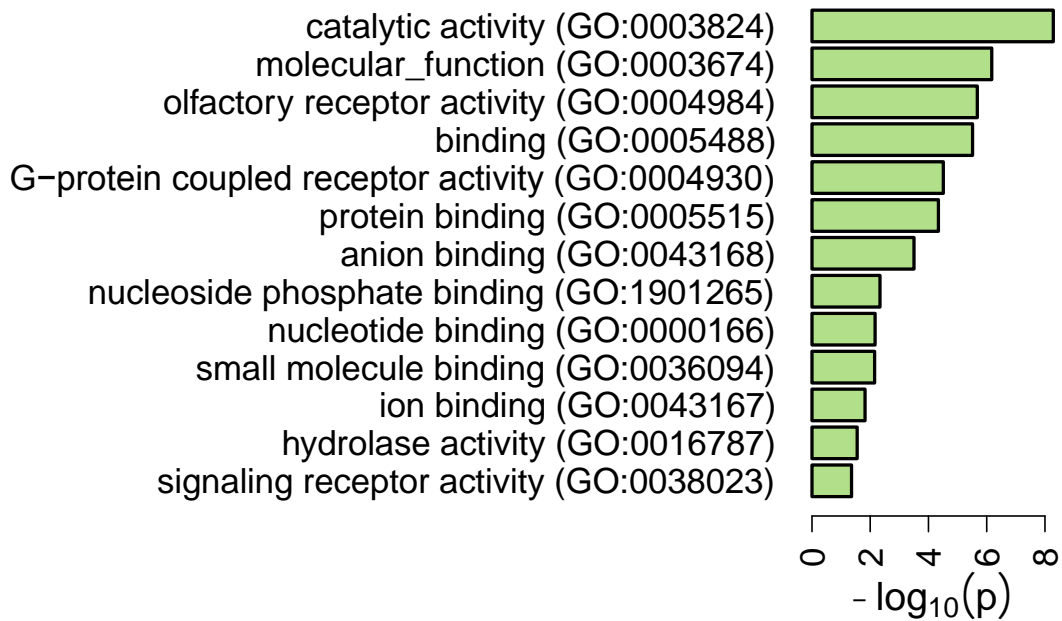

**Figure S10. Molecular function analysis of TWAS genes.** We only list functions that are significant ( $P < 0.05$ ) after Bonferroni correction.

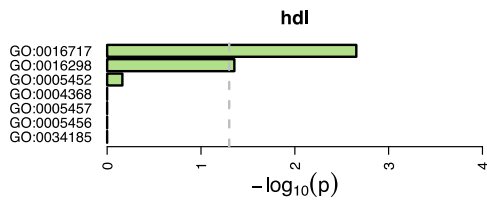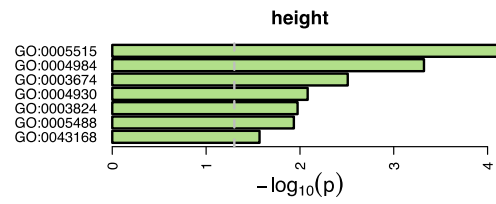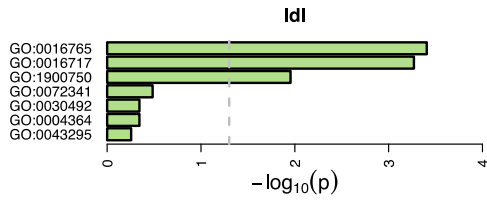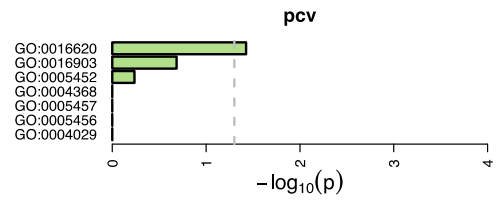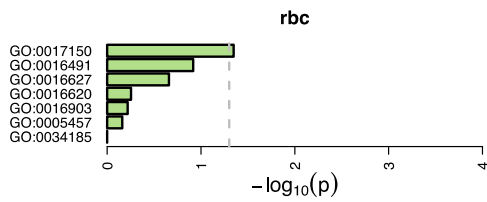

GO Terms

|            |                                                                                                 |
|------------|-------------------------------------------------------------------------------------------------|
| GO:0003674 | molecular_function                                                                              |
| GO:0003824 | catalytic activity                                                                              |
| GO:0004029 | aldehyde dehydrogenase (NAD) activity                                                           |
| GO:0004364 | glutathione transferase activity                                                                |
| GO:0004930 | G-protein coupled receptor activity                                                             |
| GO:0004984 | olfactory receptor activity                                                                     |
| GO:0005488 | binding                                                                                         |
| GO:0005515 | protein binding                                                                                 |
| GO:0016298 | lipase activity                                                                                 |
| GO:0016491 | oxidoreductase activity                                                                         |
| GO:0016620 | oxidoreductase activity, acting on the aldehyde or oxo group of donors, NAD or NADP as acceptor |
| GO:0017150 | tRNA dihydrouridine synthase activity                                                           |
| GO:0034185 | apolipoprotein binding                                                                          |
| GO:0043168 | anion binding                                                                                   |
| GO:0043295 | glutathione binding                                                                             |
| GO:1900750 | oligopeptide binding                                                                            |

**Figure S11. Biological process analysis of TWAS genes for all traits.** We only list functions that are significant ( $P < 0.05$ ) after Bonferroni correction.

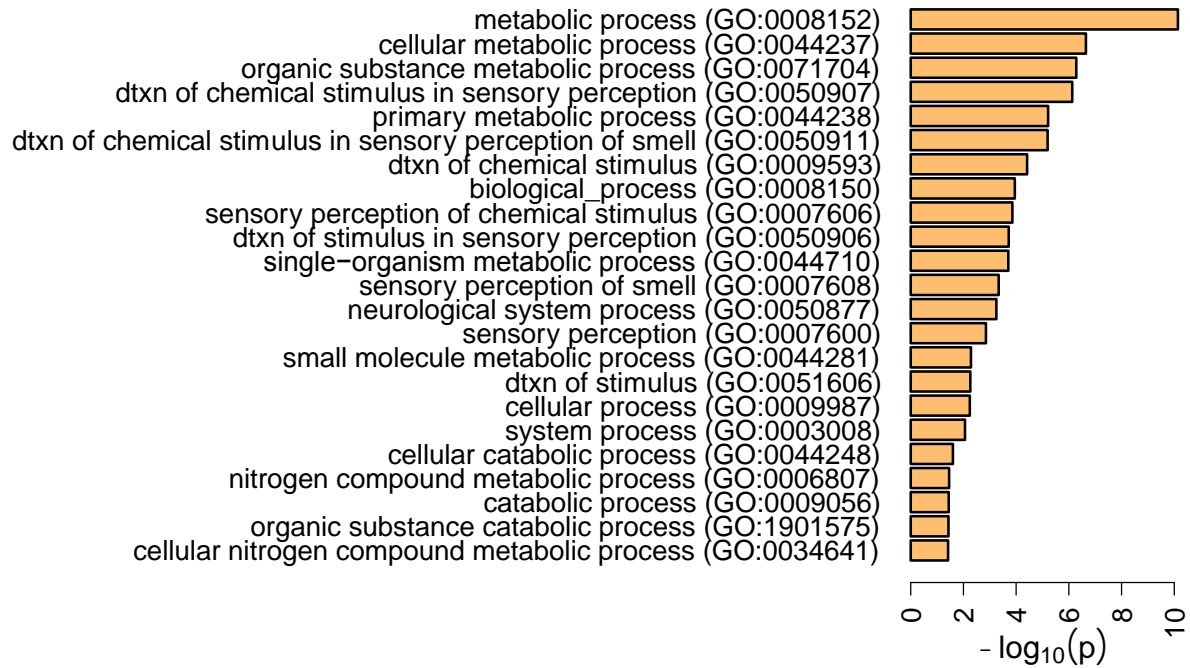

**Figure S12. Biological process analysis of TWAS genes for height, LDL, and total cholesterol.** We only list functions that are significant ( $P < 0.05$ ) after Bonferroni correction.

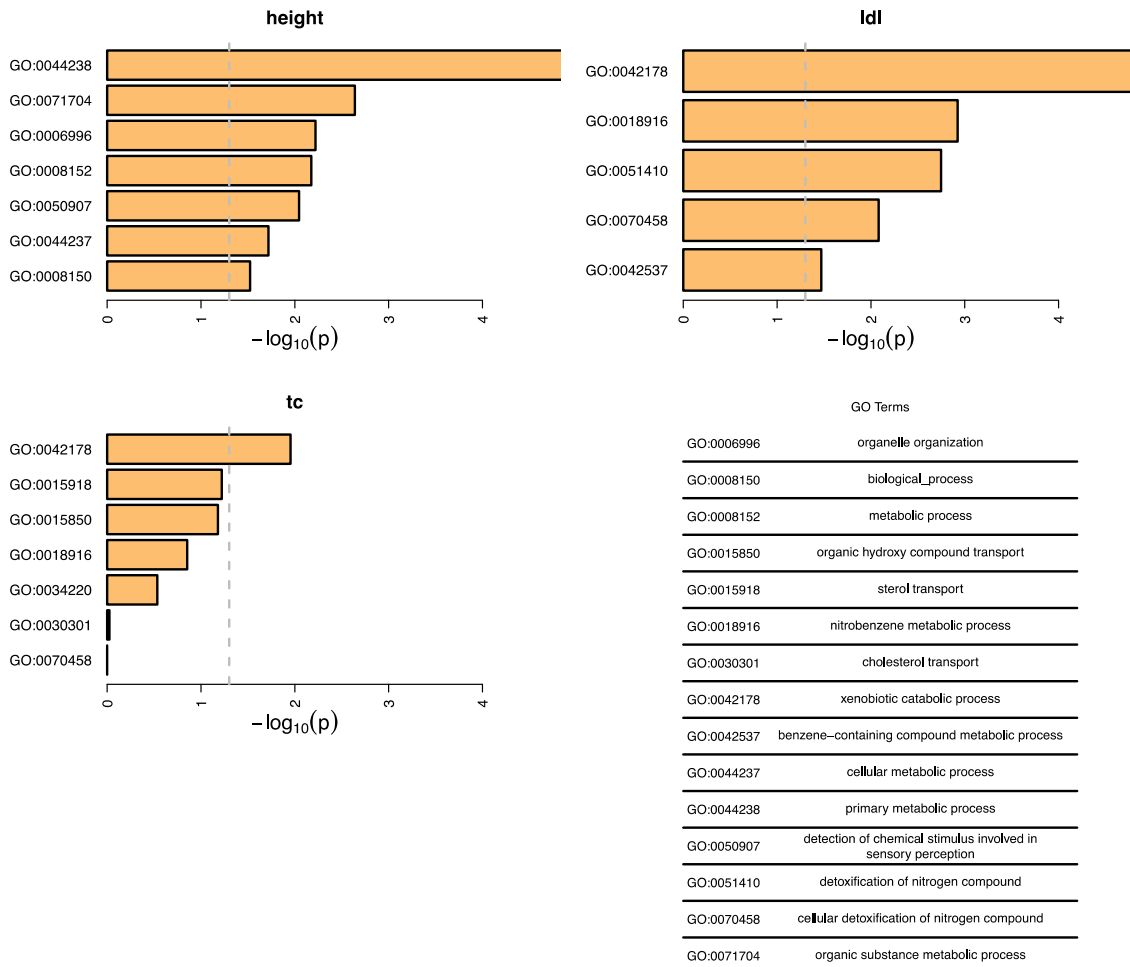

| Trait                      | Short Name | Sample Size | Number of SNPs | Trait measurement | Trait Group    |
|----------------------------|------------|-------------|----------------|-------------------|----------------|
| Age at Menarche            | AM         | 132989      | 1821879        | Quantitative      | Metabolic      |
| Body Mass Index            | BMI        | 226814      | 1859666        | Quantitative      | Anthropometric |
| College                    | COL        | 126559      | 1792881        | Dichotomous       | Social         |
| Crohn's Disease            | CD         | 51874       | 4822932        | Dichotomous       | Immune-related |
| Education Years            | EY         | 126559      | 1788888        | Quantitative      | Social         |
| Fasting Glucose            | FG         | 46186       | 1824182        | Quantitative      | Metabolic      |
| Fasting Insulin            | FI         | 46186       | 1822388        | Quantitative      | Metabolic      |
| Femoral Neck BMD           | FN         | 53236       | 4637340        | Quantitative      | Anthropometric |
| Forearm BMD                | FA         | 53236       | 4725343        | Quantitative      | Anthropometric |
| Hemoglobin                 | HB         | 51496       | 1894024        | Quantitative      | Hematopoietic  |
| HBA1C                      | HBA1C      | 46368       | 1870395        | Quantitative      | Hematopoietic  |
| Height                     | HEIGHT     | 241286      | 1854761        | Quantitative      | Anthropometric |
| High Density Lipoprotein   | HDL        | 95572       | 1805617        | Quantitative      | Metabolic      |
| HOMA-B                     | HOMA-B     | 46186       | 1820938        | Quantitative      | Metabolic      |
| HOMA-IR                    | HOMA-IR    | 46186       | 1821061        | Quantitative      | Metabolic      |
| Inflammatory Bowel Disease | IBD        | 65643       | 4823603        | Dichotomous       | Immune-related |
| Low Density Lipoprotein    | LDL        | 90811       | 1803637        | Quantitative      | Metabolic      |
| Lumbar Spine               | LS         | 53236       | 4636561        | Quantitative      | Anthropometric |
| MCH Concentration          | MCHC       | 47157       | 1893281        | Quantitative      | Hematopoietic  |
| Mean Cell Hemoglobin       | MCH        | 43733       | 1892019        | Quantitative      | Hematopoietic  |
| Mean Cell Volume           | MCV        | 48689       | 1893769        | Quantitative      | Hematopoietic  |
| Number of Platelets        | PLT        | 66867       | 1954590        | Quantitative      | Hematopoietic  |
| Packed Cell Volume         | PCV        | 45125       | 1893412        | Quantitative      | Hematopoietic  |
| Red Blood Cell Count       | RBC        | 45500       | 1892553        | Quantitative      | Hematopoietic  |
| Rheumatoid Arthritis       | RA         | 58284       | 4265540        | Dichotomous       | Immune-related |
| Schizophrenia              | SCZ        | 74626       | 4772186        | Dichotomous       | Neurological   |
| Total Cholesterol          | TC         | 95802       | 1805676        | Quantitative      | Metabolic      |
| Triglycerides              | TG         | 92007       | 1803908        | Quantitative      | Metabolic      |
| Type 2 Diabetes            | T2D        | 61857       | 1806359        | Dichotomous       | Metabolic      |
| Ulcerative Colitis         | UC         | 47746       | 4823578        | Dichotomous       | Immune-related |

**Table S1. Summary of the 30 GWAS data.**

| Expression Weights | Causal variants | $h_{GE}^2$ | SE   |
|--------------------|-----------------|------------|------|
| GBLUP              | Typed           | 0.30       | 0.01 |
| GBLUP              | Untyped         | 0.27       | 0.01 |
| True               | Typed           | 0.50       | 0.01 |

**Table S3. Simulation results for  $h_{GE}^2$  estimates.** We simulated 100 complex traits as a linear function of gene expression at 50 loci (see Material and Methods). We re-ran simulations with the causal variants for expression untyped in the genotyping data. We present the mean  $h_{GE}^2$  estimate along with the standard error across all simulation runs.

| Gene                            | Chr   | Tx Start  | Tx End    | Current Index SNP | SNP P    | New Index SNP | BP        | SNP P     |
|---------------------------------|-------|-----------|-----------|-------------------|----------|---------------|-----------|-----------|
| <i>SDCCAG8</i>                  | chr1  | 243419306 | 243663393 | rs12080886        | 5.73E-07 | rs2992632     | 243503764 | 3.245E-11 |
| <i>ABCB9</i><br><i>MPHOSPH9</i> | chr12 | 123405497 | 123451056 | rs7980687         | 1.59E-06 | rs10773002    | 123746961 | 7.742E-18 |
| <i>STK24</i>                    | chr13 | 99102452  | 99174379  | rs17574378        | 1.52E-07 | rs9556958     | 99100046  | 1.208E-11 |
| <i>EIF3CL</i>                   |       |           |           |                   |          |               |           |           |
| <i>SULT1A1</i>                  |       |           |           |                   |          |               |           |           |
| <i>RP11-1348G14.4</i>           |       |           |           |                   |          |               |           |           |
| <i>TUFM</i>                     | chr16 | 28390902  | 28415206  | rs8049439         | 1.52E-07 | rs8049439     | 28837515  | 6.992E-11 |
| <i>MIR4721</i>                  |       |           |           |                   |          |               |           |           |
| <i>SH2B1</i>                    |       |           |           |                   |          |               |           |           |
| <i>NFATC2IP</i>                 |       |           |           |                   |          |               |           |           |

**Table S7. TWAS predicted susceptibility loci for Education Years.** Reported TWAS susceptibility loci for Education Years that did not overlap a genome-wide significant SNP within  $\pm 0.5$ Mb of transcription start-site in the Rietveld et al. Science 2013 study ( $N = 126,559$ ) were proximal to genome-wide significant SNPs found in the much larger Okbay et al. Nature 2016 study ( $N = 293,723$ ).
